# Supplementary material for: Nutritional value of ensiled Guizotia abyssinica (L. f.) Cass. (Noug: Niger) treated with salt, molasses, urea or barley
Source: PeerJ. 2025 Apr 30;13:e19267. doi: 10.7717/peerj.19267 (PMC12049101; doi:10.7717/peerj.19267)
Supplement: Supplemental Information 1 [file peerj-13-19267-s001.xlsx]

## Sheet: Sayfa1
	Group	Repeat	DM	OM	Ash	CP	EE	CF	ADF	NDF	ADL	HeCel	Cel	TC	NFC	NFE	DCP	TDN	DE	ME	Nel	NEm	Neg	DDM	DMI	RFV	RFQ
Control (Niger)	1	1	201.1	96.52	3.48	4.54	8.57	23.64	38.3	54.86	23.43	.	31.43	83.41	45.11	55.34	0.35	53.47	2.36	1.93	1.19	1.09	0.53	46.16	3.13	112.11	136.2
	1	2	201.08	96.63	3.37	4.6	7.89	32.11	43.52	60.95	33.32	.	27.62	84.13	40.61	47.75	0.41	52.94	2.33	1.91	1.18	1.07	0.52	41.42	2.76	88.53	118.68
Niger with 1% Salt	2	1	217.38	96.17	3.83	4.14	5.85	24.98	33.94	48.9	24.73	.	24.16	86.17	52.23	57.02	.	52.97	2.34	1.92	1.18	1.07	0.52	50.81	3.54	139.25	152.25
	2	2	217.02	96.8	3.2	4.11	6.71	21.58	41.17	51.55	22.11	.	29.44	85.98	44.81	60.3	.	53.18	2.34	1.92	1.18	1.08	0.52	48.74	2.91	110.14	126.01
Niger with 2.5% Molasses	3	1	246.21	96.48	3.52	3.92	4.72	38.19	39.05	24.39	39.53	14.66	.	87.84	48.79	45.61	.	51.82	2.28	1.87	1.15	1.03	0.48	69.9	3.07	166.49	129.45
	3	2	251.65	96.44	3.56	4.3	5.95	35.84	36.24	26.27	36.26	9.97	.	86.19	49.95	46.34	0.13	52.37	2.31	1.89	1.16	1.05	0.5	68.43	3.31	175.65	140.98
Niger with 2.5% Urea	4	1	229.7	97.01	2.99	3.92	6.51	18.1	27.28	14.69	18.71	12.59	.	86.57	59.29	65.13	.	53.22	2.35	1.92	1.18	1.08	0.52	77.46	4.4	264.13	190.34
	4	2	233.15	97.13	2.87	4.12	7.02	20.94	26.74	17.15	19.95	9.59	.	85.99	59.25	61.38	.	53.23	2.35	1.92	1.18	1.08	0.53	75.54	4.49	262.81	194.21
Niger with 5% Barley	5	1	218.46	96.49	3.51	4.72	7.29	22.43	35.33	18.36	22.74	16.97	.	84.47	49.14	58.62	0.52	53.75	2.37	1.94	1.2	1.1	0.54	74.6	3.4	196.4	148.42
	5	2	245.81	96.55	3.45	4.82	5.97	22.44	33.55	18.77	23.02	14.78	.	85.75	52.21	59.71	0.61	53.86	2.37	1.95	1.2	1.1	0.55	74.28	3.58	205.98	156.62
Niger with 2.5% Molasses + 1% Salt	6	1	271.44	96.6	3.4	5.03	4.78	27.07	37.91	38.31	28.59	.	9.71	86.79	48.89	54.62	0.8	53.75	2.37	1.94	1.2	1.1	0.54	59.06	3.17	144.93	138.33
	6	2	264.57	96.68	3.32	5.07	6.28	24.44	35.24	48.62	28.09	.	20.53	85.33	50.09	56.27	0.83	53.97	2.38	1.95	1.2	1.11	0.55	51.03	3.41	134.7	149.42
Niger with 2.5% Urea + 1% Salt	7	1	256.45	97.78	2.22	3.53	9.39	37.93	30.83	10.89	39.6	19.94	.	84.86	54.03	43.23	.	51.42	2.27	1.86	1.14	1.02	0.47	80.41	3.89	242.61	162.71
	7	2	251.58	97.79	2.21	3.51	9.01	35.14	31.36	11.2	34.38	20.16	.	85.26	53.9	46.3	.	51.6	2.28	1.87	1.14	1.02	0.47	80.17	3.83	237.81	160.53
Niger with 5% Barley + 1% Salt	8	1	236.32	96.68	3.32	5.56	7.27	20.61	34.72	23.38	21.65	11.34	1.73	83.85	49.13	59.68	1.28	54.75	2.41	1.98	1.22	1.13	0.57	70.69	3.46	189.39	153.83
	8	2	248.78	96.58	3.42	4.87	6.75	21.92	38.52	21.54	23.68	16.98	.	84.96	46.44	59.07	0.66	53.94	2.38	1.95	1.2	1.1	0.55	72.12	3.12	174.16	136.62

## Sheet: Sayfa2
	Group	Repeat	pH	°C	WSC	L	a	b	C	h	E	color tone	saturation
Control (Niger)	1	1	4.44	22.9	16	24.2	3.64	7.77	8.58	64.9	25.68	1.13	8.58
	1	2	4.35	22.8	17	25.44	3.74	8.47	9.26	66.18	27.07	1.15	9.26
	1	3	4.41	23	15	24.93	2.38	7.87	8.22	73.17	26.25	1.28	8.22
	1	4	4.34	23.1	14	26.88	2.5	9.26	9.59	74.89	28.54	1.31	9.59
Niger with 1% Salt	2	1	4.21	23.1	17	24.67	2.51	8.17	8.55	72.92	26.11	1.27	8.55
	2	2	4.23	22.6	16	25.06	2.24	7.6	7.92	73.58	26.28	1.28	7.92
	2	3	4.12	22.8	14	24.31	3.15	7.83	8.44	68.09	25.73	1.19	8.44
	2	4	4.29	23.1	20	28.18	3.44	10.26	10.82	71.46	30.19	1.25	10.82
Niger with 2.5% Molasses	3	1	4.31	23.1	18	24.16	3.25	7.21	7.91	65.74	25.42	1.15	7.91
	3	2	3.97	22.8	19	25.17	3.89	8.56	9.4	65.56	26.87	1.14	9.4
	3	3	4.05	22.9	19	24.2	2.8	7.71	8.2	70.04	25.55	1.22	8.2
	3	4	3.89	23.6	18	24	3.07	7.24	7.86	67.02	25.26	1.17	7.86
Niger with 2.5% Urea	4	1	4.4	23	15	24.42	2.8	7.03	7.57	68.28	25.57	1.19	7.57
	4	2	4.37	23.1	16	24.74	2.85	7.59	8.11	69.42	26.03	1.21	8.11
	4	3	4.37	22.9	16	24.74	2.71	7.33	7.81	69.71	25.94	1.22	7.81
	4	4	4.38	22.9	14	23.63	3.24	7.23	7.92	65.86	24.92	1.15	7.92
Niger with 5% Barley	5	1	4.23	19.5	15	24.51	2.88	7.24	7.79	68.31	25.72	1.19	7.79
	5	2	4.12	19.3	16	24.86	3.28	7.26	7.97	65.69	26.11	1.15	7.97
	5	3	4.09	19.8	18	28.55	2.44	9.4	9.71	75.45	30.16	1.32	9.71
	5	4	4.27	19.6	13	23.43	1.98	6.01	6.33	71.77	24.27	1.25	6.33
Niger with 2.5% Molasses + 1% Salt	6	1	4.39	19.3	14	24.21	2.61	6.46	6.97	68	25.19	1.19	6.97
	6	2	4.43	19.7	16	25.42	3.49	7.45	8.23	64.9	26.72	1.13	8.23
	6	3	4.37	19.6	17	25.81	2.46	6.9	7.33	70.38	26.83	1.23	7.33
	6	4	4.4	19.4	17	23.83	2.89	6.32	6.95	65.43	24.82	1.14	6.95
Niger with 2.5% Urea + 1% Salt	7	1	4.21	19.4	15	24.72	3.14	6.94	7.62	65.66	25.87	1.15	7.62
	7	2	4.2	19.4	18	23.6	3	6.97	7.59	66.71	24.79	1.16	7.59
	7	3	4.17	19.5	14	25.96	4.54	7.46	8.73	58.68	27.39	1.02	8.73
	7	4	4.2	19.3	16	23.63	2.87	6.6	7.2	66.5	24.7	1.16	7.2
Niger with 5% Barley + 1% Salt	8	1	4.15	19.8	17	22.72	2.99	6.23	6.91	64.36	23.75	1.12	6.91
	8	2	4.13	19.6	20	22.87	2.43	7.9	8.27	72.9	24.32	1.27	8.27
	8	3	4.15	19.8	17	22.83	3.07	6.64	7.32	65.19	23.97	1.14	7.32
	8	4	4.07	19.3	19	22.39	2.45	5.73	6.23	66.85	23.24	1.17	6.23

## Sheet: Sayfa3
	10-5	Yeast-Mold	TLBc	LABc		Gruplar	Yeast-Mold	TLBc	LABc
	control	0	0	0		Control	0	1	0
						1% Salt with Niger	0	0	0
	2.5% Urea with Niger	0	0	0		2.5% Molasses with Niger	1	1	0
		0	0			2.5% Urea with Niger	0	0	0
	2.5% Urea + 1% Salt with Niger	1	8	90		5% Barley with Niger	2	125	0
		0	10	100		2.5% Molasses + 1% Salt with Niger	19	12	9
	1% Salt with Niger	0	0	0		2.5% Urea + 1% Salt with Niger	1	9	95
		0	0	0		5% Barley + 1% Salt with Niger	0	0	0
	5% Barley + 1% Salt with Niger	0	0	0
		0	0	0
	5% Barley with Niger	2	250	0
		2	0	0
	2.5% Molasses with Niger	1	1	0
		0	0	0
	2.5% Molasses + 1% Salt with Niger	15	19	11
		23	14	7
